# Supplementary material for: Exploring phytochemical constituents ofAchillea arabicaKotschy. ethanolic flower extract by LC-MS/MS and its possible antioxidant and antidiabetic effects in diabetic rats
Source: publisher site journal article supplement (doi:10.1515/znc-2022-0082), 2022-06-29
Supplement: Supplementary file 1 [file j_znc-2022-0082_suppl.docx]

**Supporting Information**


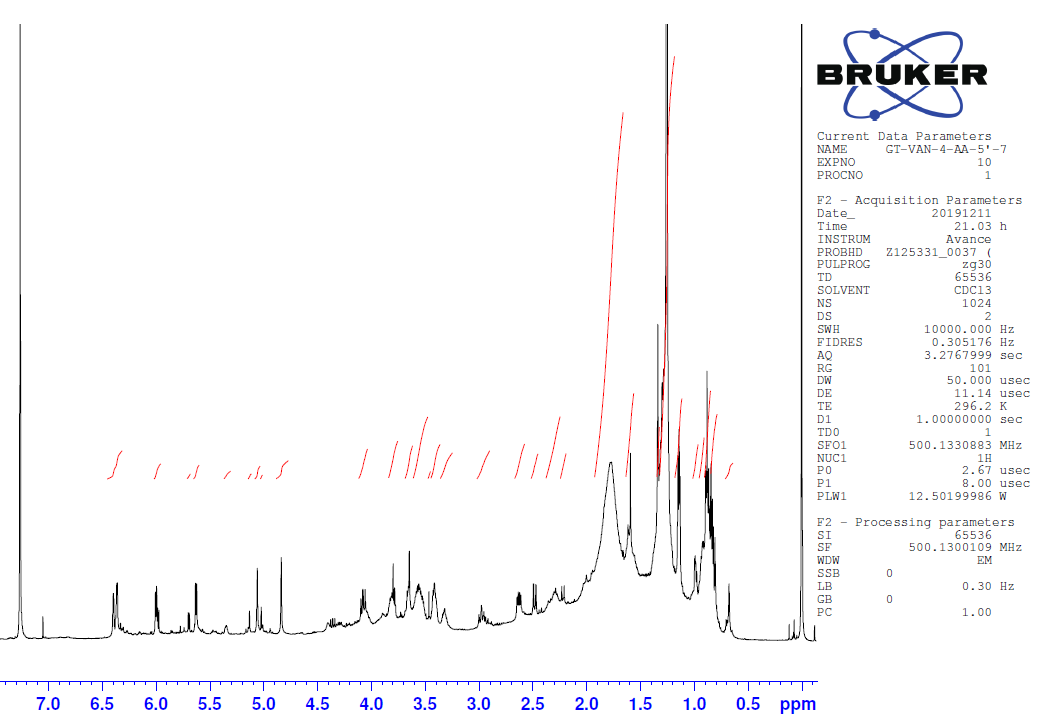


**Figure S1.** 1H NMR spectrum of edremitine (**1**) (CDCl3)


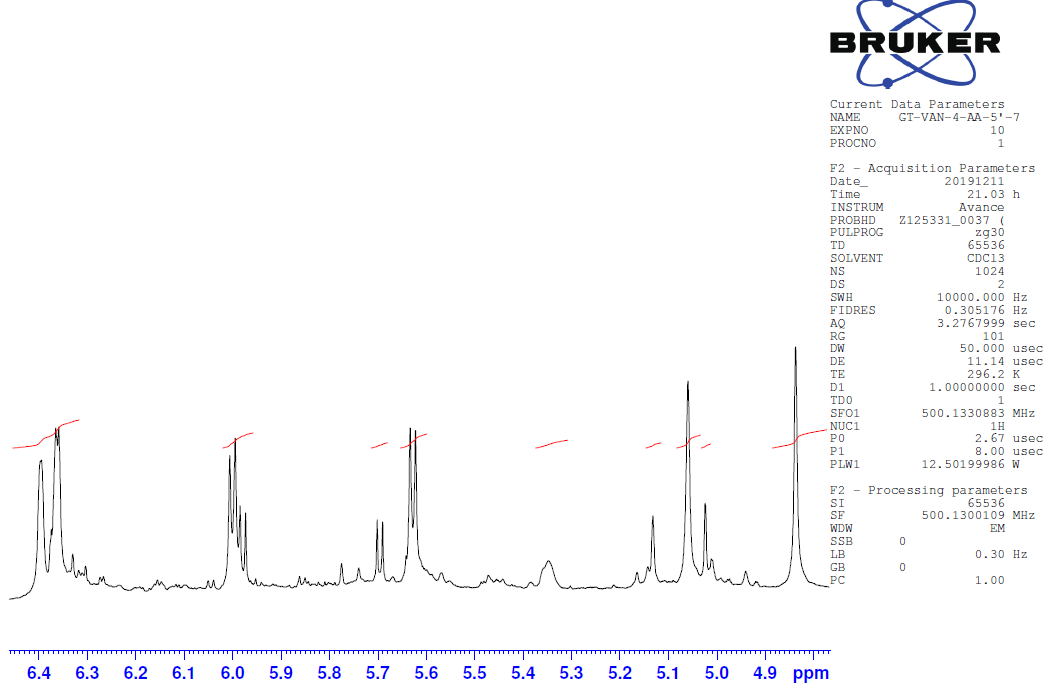


**Figure S2.** Alkene peak area at 1H NMR spectrum of edremitine (**1**) (CDCl3)


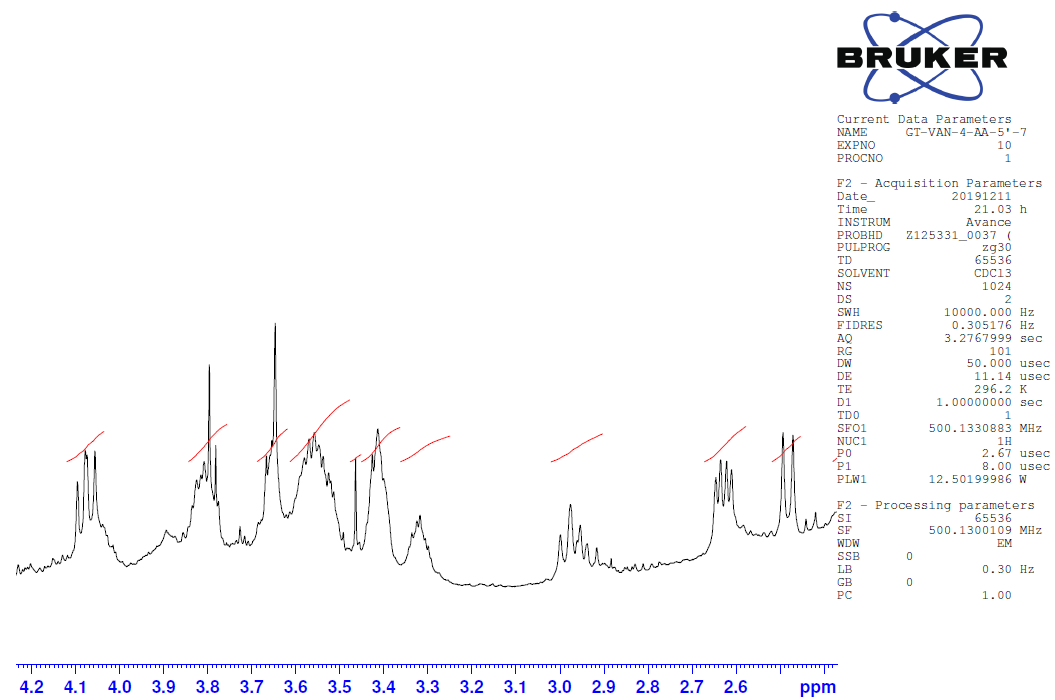


**Figure S3.** Aliphatic peak area at 1H NMR spectrum of edremitine (**1**) (CDCl3)


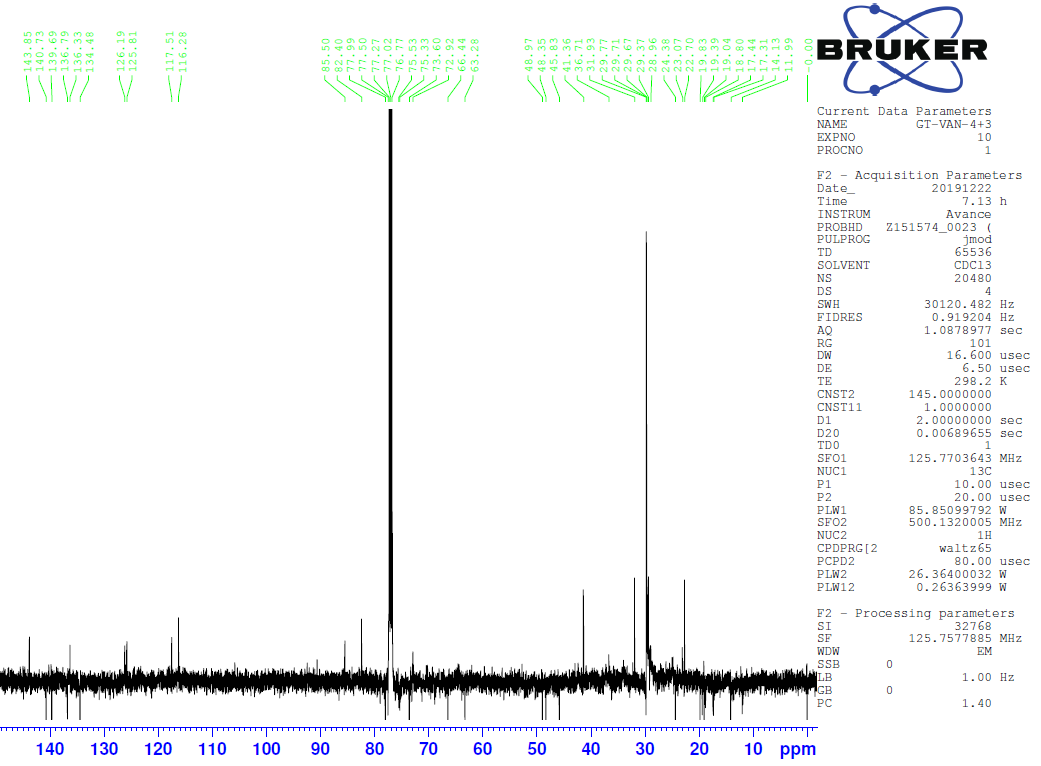


**Figure S4.** 13C NMR spectrum (APT) of edremitine (**1**) (CDCl3)


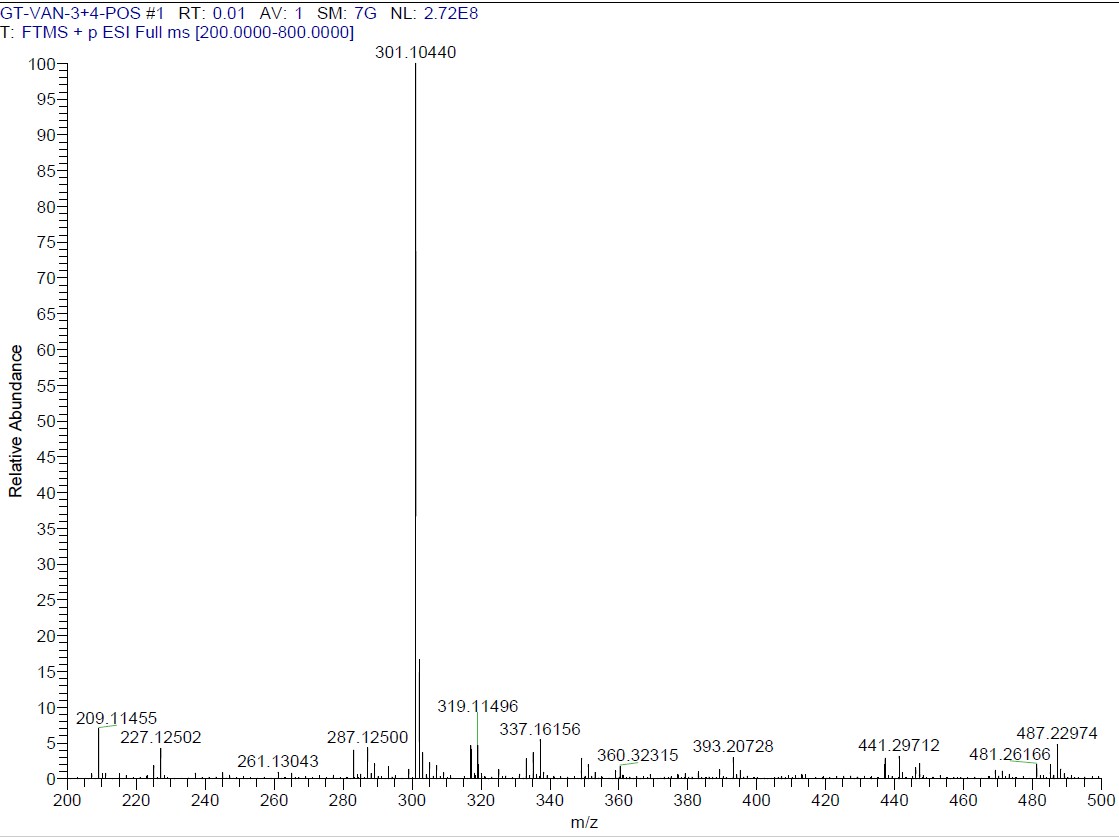


**Figure S5.** HRMS spectrum of edremitine (**1**)


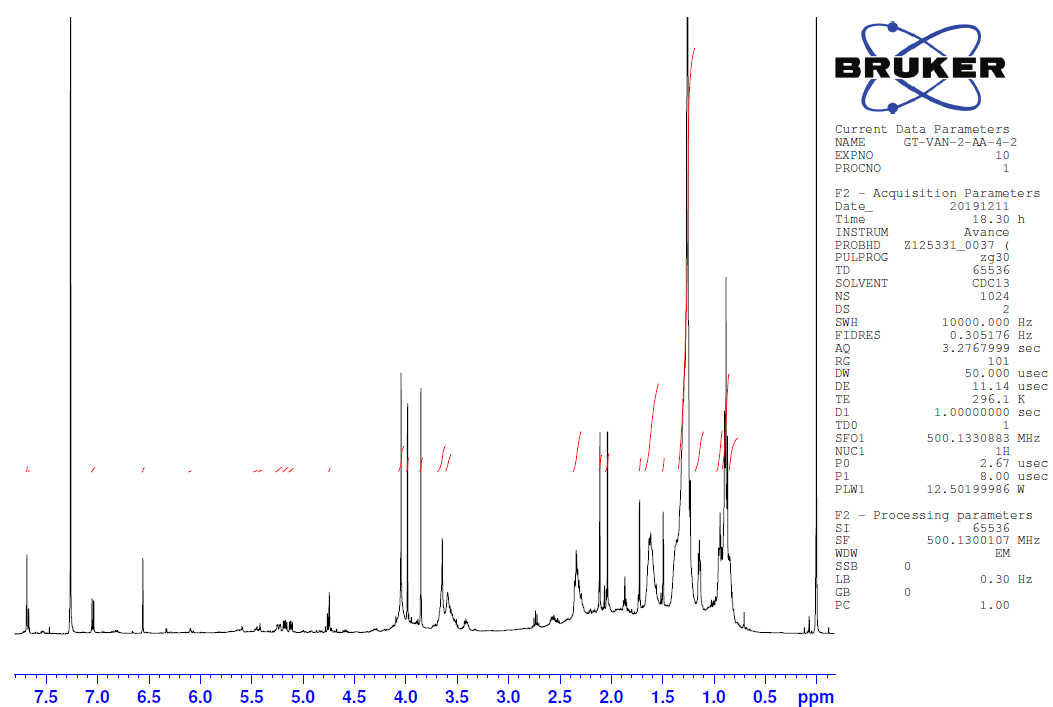


**Figure S6.** 1H NMR spectrum of achillosine (**2**) (CDCl3)


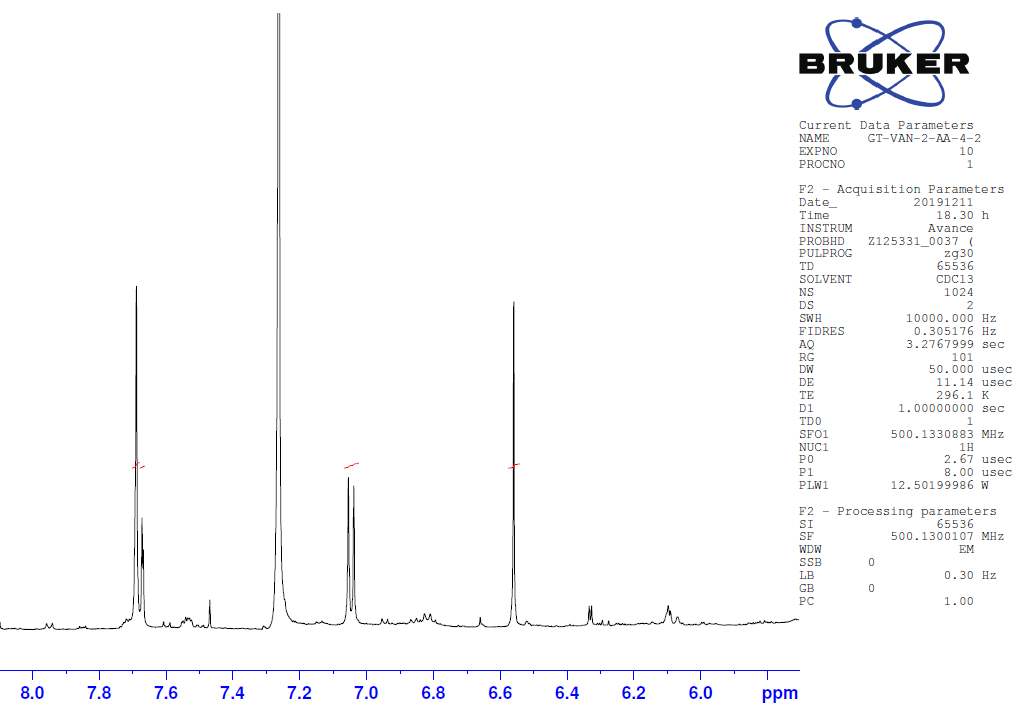


**Figure S7.** Aromatic peak area at 1H NMR spectrum of achillosine (**2**) (CDCl3)


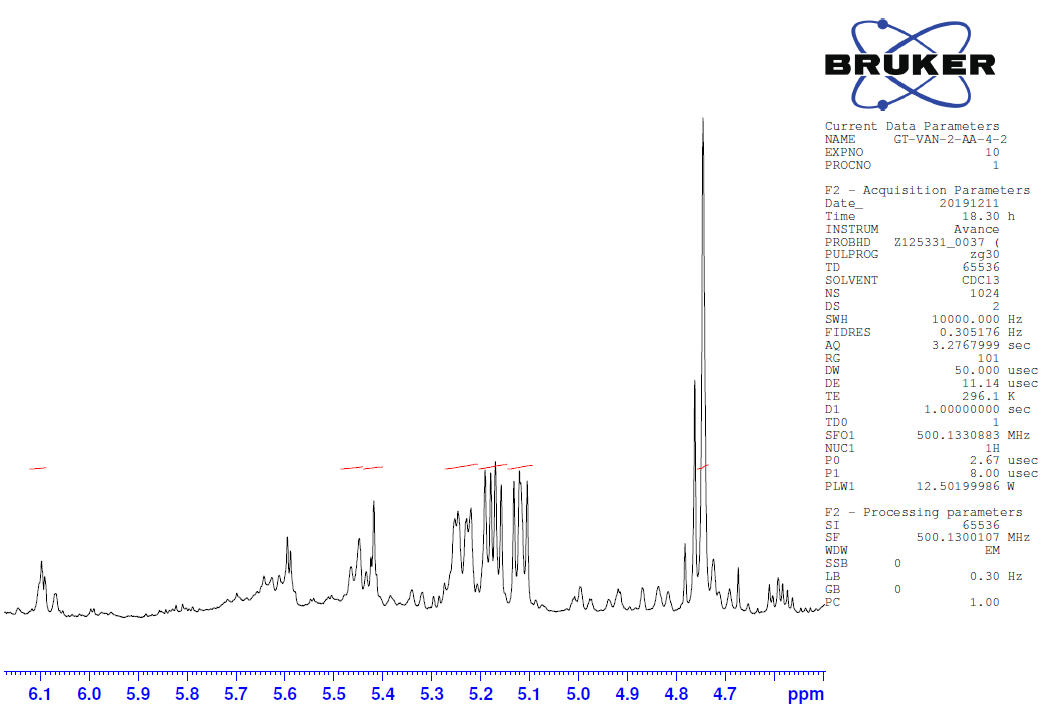


**Figure S8.** Aliphatic peak area at 1H NMR spectrum of achillosine (**2**) (CDCl3)


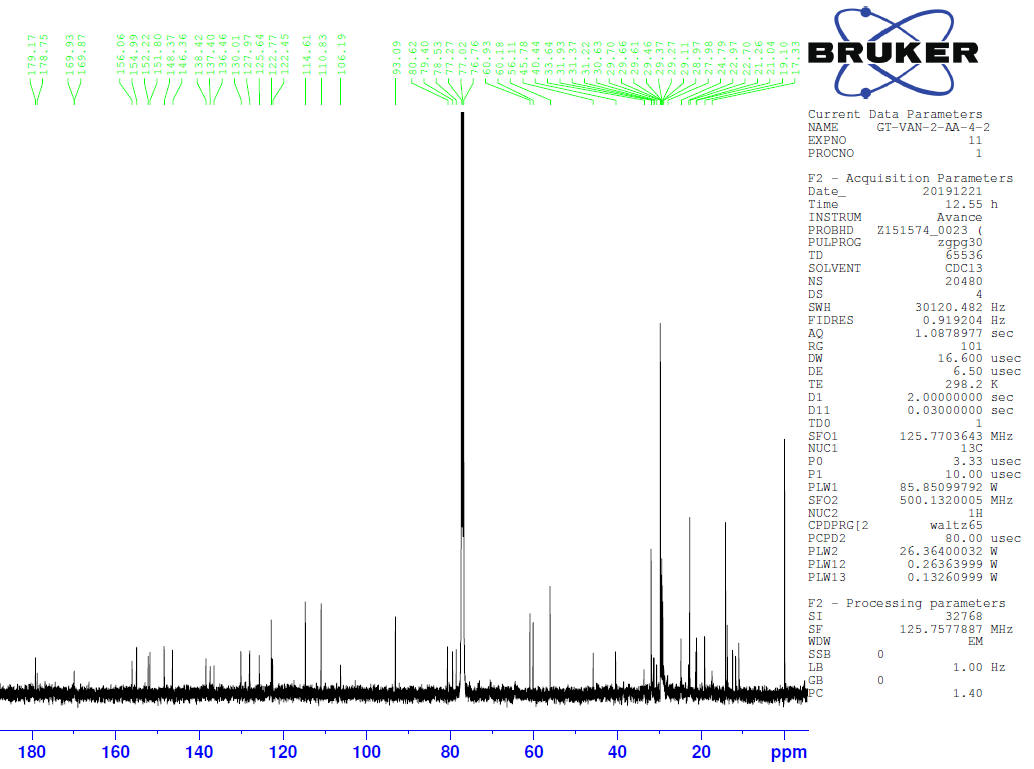


**Figure S9.** 13C NMR spectrum (APT) of achillosine (**2**) (CDCl3)


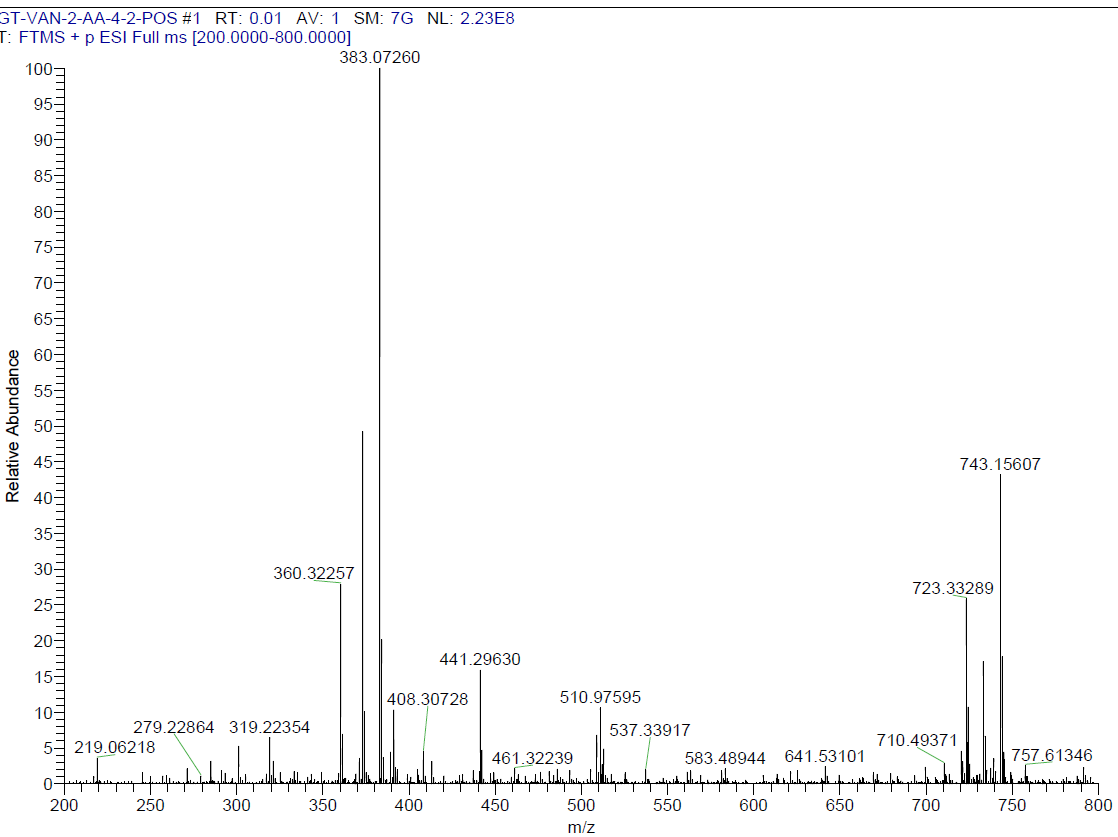


**Figure S10.** HRMS spectrum of achillosine (**2**)
